# Supplementary figures and images for: Physiological uterine uptake of 68Ga-FAPI-04 may limit its application in uterine pathology
Source: Research Square preprint supplement (doi:10.21203/rs.3.rs-249929/v1), 2021-02-24

**Graphical Abstract**


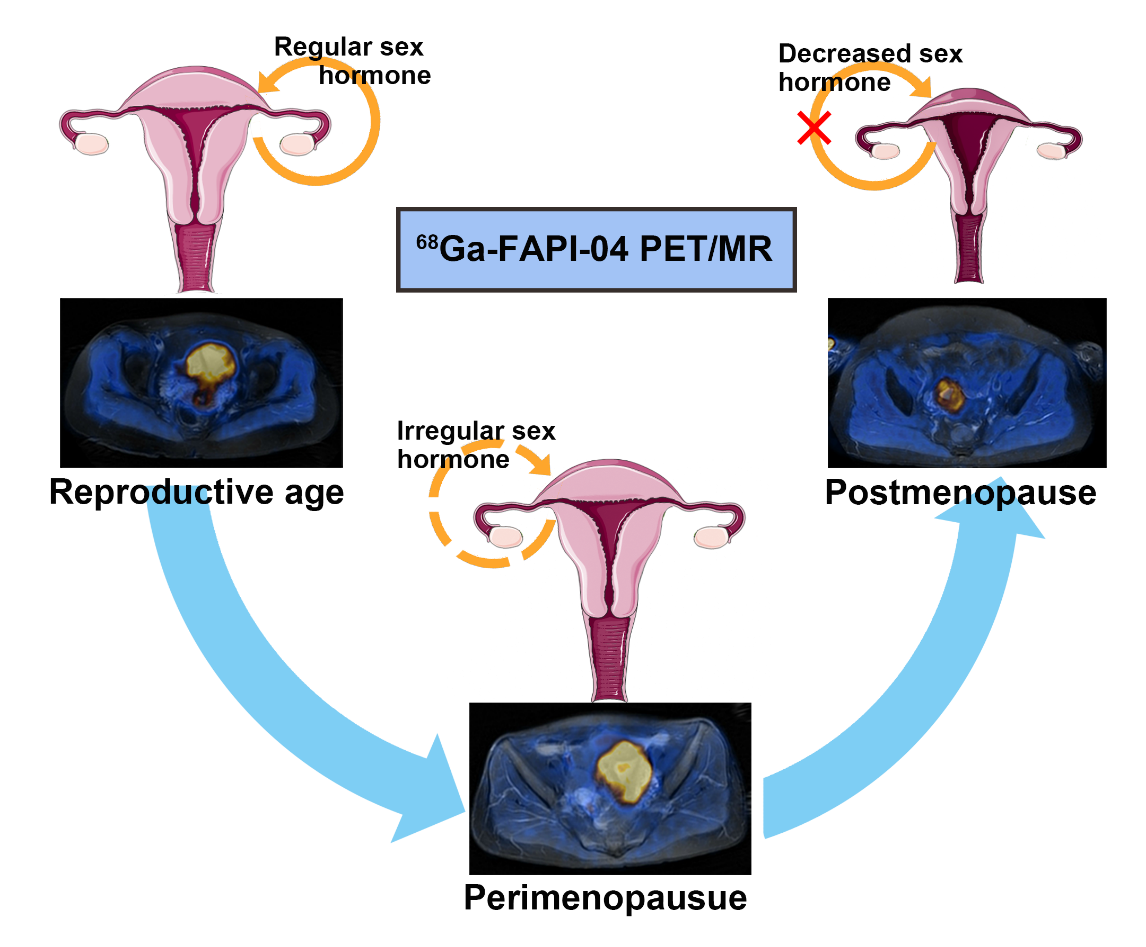

Supplement: Supplementary file 1 [file fca4c318bd33d33ba0f23943.docx]
